# Supplementary material
Source: publisher figshare collection journal article supplement (https://tandf.figshare.com/articles/dataset/_/6652178)
Supplement: Supplementary file 1 [file 3]

Sc 1 -----  
 Mo 1 MA-----O K G S G G S D A A T P N T T T T S A H K G T A E S K Q S S N A P S S G -  
 Nc 1 MAQKTQHVIPSEEQTNSASRTLSAKEKEGAATASVN-----ANSTKQSANPPAATS  
 Fg 1 -----  
 Fo 1 -----HHLWAC-----LLTRFTTS  
 Fv 1 -----  
 consensus 1 -----

Sc 1 -----  
 Mo 39 PSTTSSSSASVLPKMSDPGPPQALG-----SPASESTTK--SSSTAKDATAGTTASPYG  
 Nc 52 SGTSSSTSISNVLPRMLDPSPLPNNSEFSTDAPMGKSTQTSAQAAAAAAKDGSTAANPYG  
 Fg 1 -----MAQQNDSKVSDPDA--QSASDEMT--TQSGLD SAAK DASADAASGYG  
 Fo 15 RCCASDSL LN VMAQHND SNTSDPGA--QSVSDPMT--TQSSLD SAAKEAGADSAFPYG  
 Fv 1 -----MT--NQSSLDSTAKEAGVDSAFPYG  
 consensus 61 . . . . .

Sc 1 -----  
 Mo 91 TRSRNRGCNSRPNYAEDKDIDMDIFEQLHPQKRDDDSK KTSRQNASSSATNTGDTHNTPP  
 Nc 112 TRSRNRGTGNSRINYAEDRDLDMDIFELYPDRREGGEA-KKGSSKQAAASASSATTQAATP  
 Fg 44 TRSRNRNSSSRINYAEDRDIDADVYDYHDKKDGDSK KTSRQSSAAVN-----SDAP-  
 Fo 69 TRSRNRGTGTSRINYAEDRDIDGADVYDYHDKKDSDSK KTSRQSSAAVN-----GDAP-  
 Fv 24 TRSRNRGTGTSRINYAEDRDIDGADVYDYHDKKDSDSK KTSRQSSAAVN-----GDGP-  
 consensus 121 . . . . .

Sc 1 -----MP-----KEED  
 Mo 151 PP--PRTTNGLSSRK-----PLPMDNKQSQAAA--AKE--  
 Nc 171 SASSSSPTNGASQPAPRTAVNGTSAATTVTSTSTSTSRKPLPTIDDSRKGHSNNGTKDQO  
 Fg 96 -----PRGGASSRKA--VIDETS-----KPAQSANTPKEQQ  
 Fo 121 -----RGGASSRKA--GTDE-P-----KAAQVANTPKEQQ  
 Fv 76 -----RGGASSRKA--GTDE-Q-----KAAQVANAPKEQR  
 consensus 181 . . . . .\*

Sc 7 FOLPRRREAANKVNYNEME-----IDTKLVQOIQIAEKS GAK--TKGSNSQTPRN  
 Mo 180 --SSSNANQATGAGSTGSTQ-----TTSKKRKAASQ--TSSNQPPATES---THVPAN  
 Nc 231 ARQPSTSPAANGAATT TTTNGPTK--SKKRKADPAAIASSSQTP TSAANSSTSHNKR-  
 Fg 125 SGSSNS-----S--STTTQPPASSSQPTRKRKV--ASSSTG-----STNQA-  
 Fo 148 SGSSNN-----V--PTTTQOPAA--SQPARKRKV--VGNPAG-----STNPA-  
 Fv 103 SGSSNN-----V--PTTTQQSAA--SQPARKRKV--AGNPAG-----STNPA-  
 consensus 241 . . . . .

Sc 55 CKRTSNPASRNEKFKYQKFLHDKNTCWNFIPTLPPSFRKNSRFSNILDLD DAMIDLKMS  
 Mo 226 AKKPSN--NN-----HNSN-----AASHGADKGYAATNLLTFENC GARPKDGK  
 Nc 286 VKTISNDNNGNSKTPTNG-----PVSDLGTAAGYGETNLLTFENTKAMPKDDK  
 Fg 162 ---TSTTSNTTKKA-----TTSGTAAGISWPETNMLTFENSKGQPV DGO  
 Fo 184 ---TSV--NNSTKKT-----AASGTPSRIPWPETNMLTFDNCKSRPVNGK  
 Fv 139 ---ASV--NNSTKKA-----AASGTPSIVWPESNMLTFDNCRSRPVNGK  
 consensus 301 . . \* . . . . . \* . . . .

Sc 115 LFNTESVLLSANDTIYMISEPAGEPYVGRVVNFVSKPEFSNTIHEAIKTTSVFPAKFFQ  
 Mo 268 LIADDGTYLEVNDHVYLVCEPPGEPYLLARIMEFLHAKNDPS-----QPVDA  
 Nc 334 MVADDGTVLEVNDHVYLVCEPPGEPYLLGRIMEFLHTKNDPT-----KPVDA  
 Fg 203 MIADDGTVLEVNDHVYLVCEPPGEPYLLGRIMEFLHVQNDNS-----RPVEA  
 Fo 224 MVADDGTALEVNDHVYLVCEPPGEPYLLGRIMEFLHVQNDSS-----KPVEA  
 Fv 179 MVADD-----DHVYLVCEPPGEPYLLGRIMEFLHVQNDSS-----KPVEA  
 consensus 361 . . . . . \* . . . . \* . . . .

Sc 175 VRMNWFYRPRDIOEHVNTFNPRLVYASLHODICPISSYRGKCSIFHKDEVFDVLPNEKEC  
 Mo 315 LRVNWYYRPKDIARKVN--DTRAVFATMHSDISPLTSLRGKCTIKHKAEIKGKLE---EY  
 Nc 381 LRVNWYYRPKDIGRRVQ--DTRMVFATMHSDISPLTALRGKCOIRHKTEIP-DLA---AY  
 Fg 250 IRINWYYRPKDIGRKST--DTRMVFATMHSDISPLTALRGKCOIHHKAEIS-NMD---AY  
 Fo 271 VRINWYYRPKDIGRKST--DTRMVFATMHSDISPLTALRGKCOIHHKAEIK-NME---LY  
 Fv 219 VRINWYYRPKDIGRKST--DTRMVFATMHSDISPLTALRGKCOIHHKAEIE-DME---LY  
 consensus 421 . \* . \* . \* . \* . . . . \* . \* . \* . \* . \* . .

# PHD1 domain

Sc 235 IIRPNIFYFDELFDRYTLKYVKVYSTDKILNKWNSKSPFLYVLNRRFRYIYTEPKYPLEN  
 Mo 370 RKNEDCFWFEKLYDRIQKNYEVIPTFOIINVPE---KVKKVLDERWKYILVEQGRGKE-  
 Nc 435 KRLRDCFWFEKLYDRIQKNYEVIPTKQIINVPE---HVKKVLDERWKYILVEQGRGKE-  
 Fg 304 RKTSDSFWYDKLYDRIQKNYDLIPTRSIINVPA---NVKKVLDERWKYVLVEQGRGKE-  
 Fo 325 RKDEDSFWYDKLYDRIQKNYDLIPTRSIINVPA---NVKKVLDERWKYVLVEQGRGKE-  
 Fv 273 RKAHDSFWYDKLYDRIQKNYDLIPTRSIINVPA---NVKKVLDERWKYVLVEQGRGKE-  
 consensus 481 .. ..\*.....\*...\*...\*...\*...\*...\*...\*...\*...\*...\*...\*

Sc 295 VLKKYVFHELEVNELSPADYQWDKRCQFCKEWCIOKESLSCDECQVCAHLYCNDPPLDRK  
 Mo 426 -----L-----TSAVKTCRRCSGYCASNDSVDCAVCEHTYHMNCVRPPLLKK  
 Nc 491 -----L-----TSAVKTCRCVGYCASNDSVDCAVCQNTYHMNCVRPPLLKK  
 Fg 360 -----L-----TSAVKLCKRCTGYCA-----  
 Fo 381 -----L-----TSAVKLCKRCAGYCA-----  
 Fv 329 -----L-----TSAVKLCKRCAGYCASNDSVDCAVCQNTYHMNCVNPPLLKK  
 consensus 541 \*.....\*...\*...\*...\*...\*...\*...\*...\*...\*

Sc 355 PNKDVVWTCFSCLOKQOQTKDSH-----VRFLEEQALELDFIR---SV  
 Mo 468 PSRGFAWSAACSRQERKLEARNTPNVSLDPNAEAE---EEFFDE-EEEDAGLDTG---  
 Nc 533 PSRGFAWSCAACSRQERKLEARNTPNVLD-PNGTHFDDDEFLEDDDEDPGQVOTGMSS  
 Fg 376 --RGFAWSCAACSRQERKLEARNTPNVND-PTLDADD-DEPMDEEDEEMQGVDTST--  
 Fo 397 --RGFAWSCAACSRQERKLEARNTPNVND-PSFDAED-DDPMDEEDEEMQGLETN---  
 Fv 371 PSRGFAWSCAACSRQERKLEARNTPNVND-PSFDAED-DDPMDEEDEEMQGLETN---  
 consensus 601 .....\*...\*...\*...\*...\*...\*...\*...\*...\*

## ELM2 domain

Sc 395 RQKIE---ETSSKAIKENVGYNTENCWFQYLGITYSISHIGDALNDSMFFFPYPFKPSRVG  
 Mo 522 RTSPADGANDMHIP-ATEEQMYHASLWPYRYLGIHCKVEDALDYDDRI---YPRASTRVG  
 Nc 592 RTSPA-T-EDLHOE-ATAEQIYQCSLWPYRYLGMHCKVEDALDYDDRI---FPRASTRLG  
 Fg 428 RTSPEEG-DHAPHE-GTAEQIYQASLWPYRYLGMHCKPEDALDYDDRI---HPRAATRIG  
 Fo 449 RTSPEEG-DHPHHE-GTAEQIYQASLWPYRYLGMHCKPEDALDYDDRI---YPRASTRIG  
 Fv 425 RTSPEEG-DHTHHE-GTAEQIYQASLWPYRYLGMHCKPEDALDYDDRI---YPRASTRIG  
 consensus 661 \*.....\*...\*...\*...\*...\*...\*...\*...\*...\*

Sc 451 VK-----YQWNGCNHNVPWRRNSYISANSEE-----ERGSTKTSELAWVLD-  
 Mo 578 PRHQATVLDWPGRPVQYVKAPETLEIKKTGRKDGKLNKEAQAALEAEKVAKARKPKWTQDE  
 Nc 646 PRHQAVVVPWYGRPVQYVKP--LEIKKTGRKDGKLNKEQAALEAEKKKRETRPQWQODE  
 Fg 483 PRHQATVLPWPGQPVEYVKP--LEFKKNGKDDTKS-KEALAAIEAEKISRGNRPKQVQDM  
 Fo 504 PRNQANVLPWPGKPVVEYVKP--LEIKKNGKDDTKS-KEALAAIEADKISRGRPKWVQDM  
 Fv 480 PRNQANVSPWPGKPVVEYVKP--LEIKKNGKDDTKS-KEALAAIEADKISRGRPKWVQDM  
 consensus 721 .....\*...\*...\*...\*...\*...\*...\*...\*...\*

Sc 492 -----ASKITTRKLSEYLEQCKSEICP  
 Mo 638 PPGYVPRGEDYPNDDEPRNTAQOLHWRPPELDLPEESGPEEAHISESEIDKYMEQAKGM-AL  
 Nc 704 PAGYVERGGDDTV-----TVLYKPPELC-----GKOMPNEAIDEFMDKARGM-AV  
 Fg 540 PPGYTVRGEDCDEDDPNCTAKPMWIPPS-----EDVIKEKDINOYMEKAKAM-AK  
 Fo 561 PPGYTARGEDFDDDDPRCTATRMWIPPP-----EKVIKEKDMNEYMEKAKGM-TK  
 Fv 537 PPGYTARGEDFDNDDEPKCTATRMWIPPP-----DKVIKEKDINEYMEKAKGM-TK  
 consensus 781 .....\*...\*...\*...\*...\*...\*...\*...\*...\*

Sc 514 ILNVRGETCNFIDVVLKNLLFTNYDTAEAFKKCKRELSRKFLKEPSFTAVEIRKFEEAVE  
 Mo 697 DLDLPEHSTNLLDQALRLLYEHGYDAERALEEL-PKLSKEAFDEPOLTADELKKFEEGGS  
 Nc 748 ELGLPERSTNLQDVARDLLFKNDFDPKKALQOL-SKVPKAEFKEPELTPAELKKFEEGVC  
 Fg 589 DLGLPERSTNLQDVAADTLFHTGFDTKRAALKAL-PEKDKAEFKEPELTPAEQKKFEEAVI  
 Fo 610 DLGLPERSTNLQDVAANKLFRAEFDTEHALKDL-SETKKEAFKEPELTPAEQKKFEEAVI  
 Fv 586 DLGLPERSTNLQDVAANKLFLAEFDTOHALKDL-SETKKEAFKEPELTPAEQKKFEEAVI  
 consensus 841 .....\*...\*...\*...\*...\*...\*...\*...\*...\*

Sc 574 KFGSELRPVCEYVGTQPMMSMIVRFYYNWKKTTERGLTVRGKLSKLSKNKRKKEI-----  
 Mo 756 KFGSELYSVKKHKIKTVKPGTLVRFYYTWKKTERGKQVWGNYSGRKSKKEAKEAKKAETAS  
 Nc 807 KYGSELHLVMMKHVKTLKPATVTRFYTWKKTERGKQIWGNFAARKGKRDAKKAEE----AA  
 Fg 648 KYGSELYLVRKHVKSMYGMVTRYYYAWKKSERGMQVLENMAGRKKGKKEAKRAE----AA  
 Fo 669 KYGSELYLVRKHVKTMHYGMVTRYYYAWKKSSARGKQVLENQAGRKKGKKEAKRAE----AA  
 Fv 645 KYGSELYLVRKHVKTMHYGMVTRYYYAWKKSSARGKQVLENQAGRKKGKKEAKRAE----AA  
 consensus 901 .....\*...\*...\*...\*...\*...\*...\*...\*...\*

Sc 627 ANHENDVETKYIDDSSEFDTEKLSLAESSFQCMFCKTDYSPMWYRVTTGSSDDEKIKIRMQT  
 Mo 816 QNKMODDVADHDHDSAFDAAKAAEKKRSFICKFCNTKSSRQWRRAPNASGALV-----  
 Nc 863 ATKQADDVADHDHDSAFDAGKAKARKKAFMCKFCGTKASRQWRRAPTISQPIG-----  
 Fg 704 ANKMADDVADNDHDSAFDAEKANQKKRGFVCQFCSTTSSRQWRRAPNPTSGVV-----  
 Fo 725 ASKLADDVADNDHDSAFDTEKANQKKQGFVCQFCSTTSSRQWRRAPNPVPGVV-----  
 Fv 701 ASKLADDVADNDHDSAFDIEKANQKKQGFVCQFCSATFSRQWRRAPNPVPGIV-----  
 consensus 961 .....\*.....\*\*\*.\*\*..\*.....\*.\*.\*.....\*.\*.\*.....

Sc 687 GVNEKTEISEKSPAHSKKNEKLGALCIRCAWMWRRYAIAKWPPLLETLRKITGTCONSFYS  
 Mo 869 -----TESGGKGANKDKGVQYVVALCRRCAELWRRYAIAQWEDVDQLYSKVAQAGGR-----  
 Nc 916 -----ETSG-RSTKQDKKGEFIPALCRRCAELWRRYAIAQWEDVDEVAKKVAQLAGR-----  
 Fg 757 -----NDGGSKSSNKDKGOERVVALCRRCAELWRRYAIAIRWEDMEEVAKKVAQSGGR-----  
 Fo 778 -----NDGGSKNSNKEKGQERVVALCRRCAELWRRYAIAIRYEDMDEVNKKITQGR-----  
 Fv 754 -----NDGGPKSSSKEKGQDRVVALCRRCAELWRRYAIAIRYEDVDEVSKKVNOGSGR-----  
 consensus 1021 .....\*.....\*\*\*.\*\*..\*.....\*.\*.\*.....\*.\*.\*.....

Sc 747 AIEGIIENNTNKFTLSPFQAHNKLLEWELVQDSELIIRORMKVYKNPNSFVKMKRYSMT  
 Mo 920 -----AWKKKIIDEELLKEIVAA-----EQRSKNTESSSG  
 Nc 966 -----NWKPKVDEDLKELLA-----DEMIANTKIRTP  
 Fg 808 -----AWKRKQDEELLKELQAA-----KEMGMMTPERAP  
 Fo 828 -----AWKRKQDEELLKELQAA-----KEMGMMTPERAP  
 Fv 805 -----SWKRKQDEDLLRELOVA-----KEMGMMTPERAP  
 consensus 1081 .....\*.....\*.....\*.....\*.....\*.....

Sc 807 FHTQLYKMAVRSYRKNEFHPEETMQRDLELFIEDNKEVRKAIPKPERAKNT-----  
 Mo 949 AA-----TPPSNTTPAPAST-----QPAASGOEPARKKQKTTPPPQDK  
 Nc 995 EP-----TPV-----PTLVH-----EPPAAGQEPPrKKLKGSTREKDK  
 Fg 837 TP-----SAA-----P-----AAVANVOEPPrKKLKSVPDKDA  
 Fo 857 TP-----SAT-----P-----A-VATVQEPPrKKLKGASDKDV  
 Fv 834 TP-----SAA-----P-----A-VATVQEPPrKKLKGASDKDV  
 consensus 1141 .. .. . . . . . . . . . . . . . . . . . . . . . . . . . . . . . . . .

Sc 859 ---KDEFVNIIRQSPGTIKTSDTSRNRKCNDFIEKASNNNIPKITNASNDLIEISIK  
 Mo 987 DVEMTGTEPVGTTTTAPASKK-----KEK-----  
 Nc 1028 DKAQKEKE-----KDKD-----KEN-----  
 Fg 866 DNGHSDT-----K-----ASA-----  
 Fo 885 DNGHSDA-----K-----ASA-----  
 Fv 862 DNVHSDA-----K-----ASA-----  
 consensus 1201 ..... ..

Sc 915 TGGSSSGSVSVDKGFKFVKFDNKTQRLRNSLKLNNKLPKYNEPSTKKIKMINDIALSN  
 Mo 1011 -----ASLEKEKEKEKE-----K-----  
 Nc 1038 -----EKVEKEKEKEKE-----KEKELEP  
 Fg 876 -----AGSTTSKK-----  
 Fo 895 -----AGSTTSKK-----  
 Fv 872 -----TGSTTSKK-----  
 consensus 1261 ..... ..

Sc 975 PLNEPNGASY-NYTVISHSKETSVALEKYHDGNKPSKMLEKDMILKHTKNKPNPD TAWA  
 Mo 1024 -----EKE-----KEKEKEPVK-EKKEAPAPPPVPEI  
 Nc 1057 AVSEPGSVASTPTPVITKKKE-----KVVEKPVAI-EKPAPPPPPVPEI  
 Fg 884 -----KDKD-----K-----SVESVTVPEM  
 Fo 903 -----K-D-----K-----SVENLTVPDI  
 Fv 880 -----K-D-----K-----SVENLTAPDI  
 consensus 1321 .. .. \*

Sc 1034 NNSARTFCSVCKEKFNDNDNYEVVCGNCGLTVHYFCYAIKLPKDMKKNNTNLKTFKWLCDP  
 Mo 1050 PKPRTMPCDICROL-EPLGDQHITCKECRMVHRNCYGVVDN-----RNPgKWVCDM  
 Nc 1101 PKPRTLPCATCROM-EPMGDQHLSCKECRMVHRNCYGVLEH-----RAPGKWTCDM  
 Fg 899 PKPRVLPCAVCGEL-EPQGDQHLSCRECRILT VHRNCYGIMDN-----RNPgKWTCDM  
 Fo 916 PKPVVLPCAVCGQL-EPQGDQHLSCRECRILT VHRNCYGIMDN-----RNPgKWTCDM  
 Fv 893 PKPLVLPCAVCGQL-EPRGQHLSCRECRILT VHRNCYGIMDN-----RNSGKWTCDM  
 consensus 1381 .....\*.....\*.....\*.....\*.....\*.....\*.....\*.....\*.....



```

Sc
Mo      1553  PPPMQAPPLQPPPIAPPMA--RMSG-----RGQTGVQPPGPVPFSQAYQPLPEPPPT
Nc      1566  PPLAHPAPTRPP-VSHPPVPVSGPVAPQVAPPPTLPPSLAPRGPSMPQSLFGSA--PP--
Fg      1353  PPAM-----QAPSLVADHALG-ARPP-----APH-AYAAPPPhR--
Fo      1355  PPPM-----QAPALVADHALG-ARPP-----PPA-PYAPLEPPQR--
Fv
consensus 1921  . . . . . . . . . . . . . . . . . . . .

```

```

Sc
Mo      1605  HSAPSGPYGDWHRRTTHHGPP-----MNGRPPSRA-----SRISPIIPPLA----
Nc      1621  -----RPYDDWHRQPSGHPPPLHPARQLNGTGPS-----PPPLNSMSSLAPPNHLRPS
Fg      1385  -----PAYSDWGRPASQQS---SPSRHINGGPPPPPIHNAPPMTNLSSLRPPPVVGPV
Fo      1387  -----PSYSDWGRPASQQG---SPPRHINGGPPPI-----HNPPPMSTLSSLRPPPVVGPV
Fv
consensus 1981  . . . . . . . . . . . . . . . . . . . .

```

```

Sc
Mo      1645  -----PPALRPPSLHHSPHAP-HAHLTNGHVMVNGAGAPGRRISGPPPPPSRDGO
Nc      1669  PLSLIANLTHAQPPPPPPQNGHNGHNGHIAHPSPYARMDGLPLSPRRVSGOPTTSGG--
Fg      1437  -----PTAPPPANHHGGHPS-----SPYTNGLPPLSPRQLNGPAPPSR---
Fo      1434  PPV-----GSSPPAPPPANHHGGPPS-----QPYTNGLPPLSPRRLNGPAPPPR---
Fv
consensus 2041  . . . . . . . . . . . . . . . . . . . .

```

```

Sc
Mo      1693  GPYMGSYHSPA--P--Y-----HSPAPHQSNGTMVPPERIDHAFASVL
Nc      1727  -SYLSGGSLHSHGGPPDLRPPTDLRTDLRPHSMLNHALPPHHVTGLPPQPAAAEQHQP-L
Fg      1474  --YAHPTYQHGGRPVP-----PA-----HLPPPNMANGAPPPPPPPPRGEG-Y
Fo      1477  --YTHPTYQTHGHNAPPPPPPAS-----HLPPPTLTNGAPP--PPPRHDG-F
Fv
consensus 2101  . . . . . . . . . . . . . . . . . . . .

```

```

Sc
Mo      1731  NPPRAYG--NSGSVQPPAHMSPAVARDAPISRDGPLLSQPPPP--ARAPESRPATGAS
Nc      1785  SFLRHWNSTAQONQPPPLHHTSSY-----Q---QVSGLPPPPPRDNKP--KDMKTGAS
Fg      1513  PHE--I---NPO-----RPPY-----T---PQTSPPGSRNGHPPQNRPASGAS
Fo      1518  SHE--L---HPQ-----RPTY-----P---APHGSPPGPRNGPQPPSSRPASGAS
Fv
consensus 2161  . . . . . . . . . . . . . . . . . . . .

```

```

Sc
Mo      1785  ASPSLRNLLS
Nc      1833  SSPSLRNLLH
Fg      1549  ASPSLRNLLS
Fo      1555  ASPSLRNLLS
Fv
consensus 2221  . . . . . . . . . .

```
